# Supplementary material
Source: PubMed Central journal article supplement (PMC4506269)
Supplement: NIHMS664198-supplement-Supp_TableS1-S3.pdf [file NIHMS664198-supplement-Supp_TableS1-S3.pdf]

Table S1. Ingenuity Pathway Analysis results for the specified classes

| Category              | Overrepresented pathways                          | -log (p-value) |
|-----------------------|---------------------------------------------------|----------------|
| Genotoxicity          | p53 signaling                                     | 6.79           |
|                       | Cell cycle: G2/M DNA damage checkpoint regulation | 3.10           |
|                       | VDR/RXR activation                                | 2.25           |
|                       | Eicosanoid Signaling                              | 1.50           |
| ER                    | Endoplasmic reticulum stress pathway              | 6.14           |
|                       | NRF2-mediated oxidative stress response           | 3.10           |
|                       | Glycine, Serine and Threonine metabolism          | 2.56           |
|                       | One carbon pool by folate                         | 2.40           |
|                       | Alanine and Aspartate metabolism                  | 1.89           |
|                       | Neurotrophin/TRK Signaling                        | 1.56           |
| Microtubule inhibitor | Cell cycle: G2/M DNA damage checkpoint regulation | 1.98           |
|                       | Lysine biosynthesis                               | 1.45           |
| HDAC inhibitor        | Death receptor signaling                          | 2.52           |
|                       | Xenobiotic metabolism signaling                   | 2.34           |
|                       | Endoplasmic reticulum stress pathway              | 2.25           |
|                       | p38 MAPK signaling                                | 2.10           |
|                       | Huntington's disease signaling                    | 2.06           |
|                       | Synaptic long term potentiation                   | 1.83           |
|                       | Sphingolipid metabolism                           | 1.79           |
|                       | Fc epsilon RI signaling                           | 1.69           |

Ingenuity Pathway Analysis is shown for subset of genes from Fig. 2, whose response was common for a particular class of stress agents. Pathways showing significant over-representation,  $p \leq 0.05$ , for each class are shown.

Table S2. Ingenuity Pathway Analysis for 65-gene classifier

| Overrepresented pathways                          | $-\log(\text{p-value})$ |
|---------------------------------------------------|-------------------------|
| p53 signaling                                     | 6.44                    |
| Cell cycle: G2/M DNA damage checkpoint regulation | 3.50                    |
| ATM signaling                                     | 3.10                    |
| GADD45 signaling                                  | 2.78                    |
| Hereditary breast cancer signaling                | 2.28                    |

The top five over-represented Ingenuity pathways are shown for the 65-gene genotoxicity signature taken from Fig. 4A. Our TGx-28.65 signature overlapped substantially with many of the same genes identified in genotoxic subclusters using an unsupervised method; e.g., half of the genes from Fig. 3A are in the TGx-28.65 biomarker.

Table S3. Ingenuity Pathway Analysis for alcohol treatment

| Overrepresented pathways             | -log (p-value) |
|--------------------------------------|----------------|
| TNFR2 signaling                      | 5.52           |
| Endoplasmic reticulum stress pathway | 3.77           |
| ATM signaling                        | 3.54           |
| Selenoamino acid metabolism          | 3.15           |
| TNFR1 signaling                      | 2.68           |

The top five over-represented Ingenuity pathways are shown for genes showing at least 1.7-fold response with significance of  $p \leq 0.01$  after 2% ethanol exposure. Interestingly, tumor necrosis factor alpha (TNF $\alpha$ ) is a proinflammatory cytokine that appears to play a crucial role in the pathogenesis of alcoholic liver disease (ALD). For example, a previous study using TNFR1 knockout mice showed that TNF $\alpha$  makes an appreciable contribution to alcohol-induced ALT elevation, necroinflammation, and apoptosis in liver tissue (Ji, C., Deng, Q., and Kaplowitz, N. (2004). Role of TNF-alpha in ethanol-induced hyperhomocysteinemia and murine alcoholic liver injury. *Hepatology* 40, 442-451).
